# Supplementary material
Source: Springer Nature journal article supplement (https://www.springermedizin.de/resource/supplementary/12877_2014_1070_MOESM1_ESM.pdf/9440744)

**0 THEORETICAL PHASE****I MODELING****II EXPLORATORY TRIAL****ADDITIONAL OUTCOMES**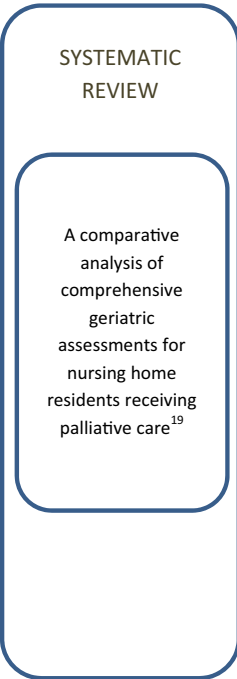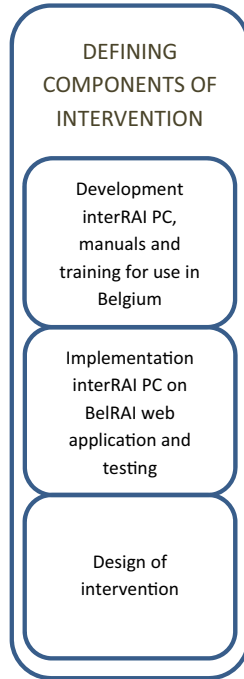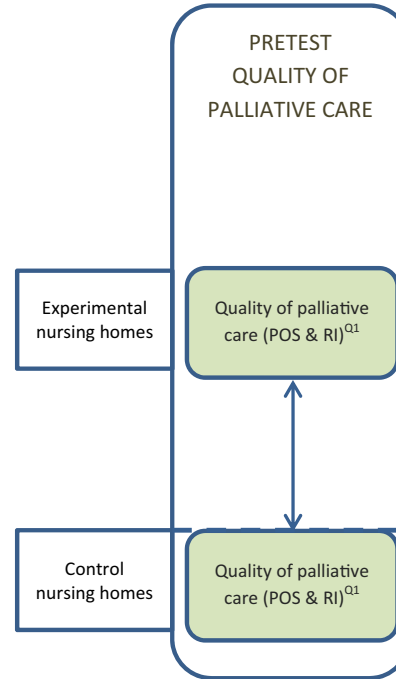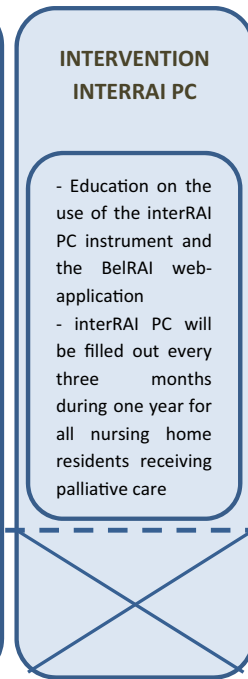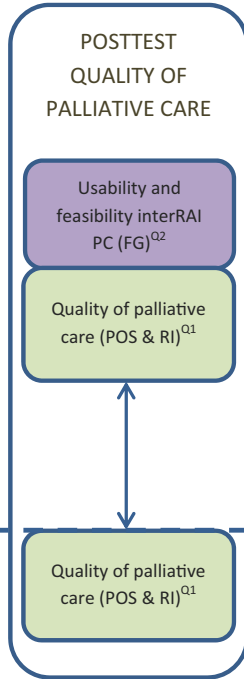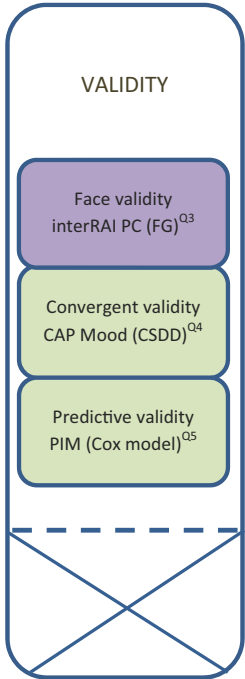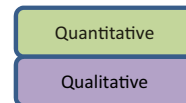

Supplement: MOESM1 [file 9440744]
